# Supplementary material for: Simple sample processing enhances malaria rapid diagnostic test performance
Source: Royal Society of Chemistry journal article supplement (doi:10.1039/c4an00338a), 2014-01-01

# Simple Sample Processing Enhances Malaria Rapid Diagnostic Test Performance

## Supporting Information

Keersten M. Davis<sup>§a</sup>, Lauren E. Gibson<sup>§a</sup>, Fredrick R. Haselton<sup>b</sup>, David W. Wright<sup>\*a</sup>

Department of Chemistry<sup>a</sup> and Department of Biomedical Engineering<sup>b</sup>, Vanderbilt  
University, Station B 351822, Nashville, TN 37235-1822, USA  
Fax: 615-343-1234; Tel: 615-322-2636

§ Both authors contributed equally to this work.

\*David.Wright@Vanderbilt.edu

**Table 1.** Specifications of the individual blood samples used for the surrogate patient study

| <b>Patient</b> | <b>Lot #</b> | <b>Gender</b> | <b>Age</b> | <b>Race</b> |
|----------------|--------------|---------------|------------|-------------|
| 1              | BRH701920    | Male          | 46         | Black       |
| 2              | BRH701915    | Male          | 29         | Black       |
| 3              | BRH701919    | Male          | 41         | Black       |
| 4              | BRH701918    | Male          | 66         | Hispanic    |
| 5              | BRH701916    | Male          | 50         | Black       |

**Table 2.** Specifications of the RDTs used for this study.

| <b>Brand</b>  | <b>WHO PDS</b> | <b>Catalog #</b> | <b>Lot #</b> | <b>Date of Manufacture</b> | <b>Expiration Date</b> | <b>Manufacturer</b>       |
|---------------|----------------|------------------|--------------|----------------------------|------------------------|---------------------------|
| Paracheck Pf  | 96.0           | 30301025         | 311310       | 02/12                      | 01/14                  | Orchid Biomedical Systems |
| One Step Pf   | 67.7           | 522352           | 201209025    | N/A                        | 09/14                  | Blue Cross Biomedical     |
| ParaHit Pf    | 80.8           | 551C101-50       | 4000006366   | 3/24/11                    | 3/24/13                | Span Diagnostics          |
| ParaHit Total | 35.4           | 551C204-50       | 4000007699   | 11/24/11                   | 1/24/13                | Span Diagnostics          |
|               |                |                  | 4000010071   | 12/31/12                   | 12/31/14               | Span Diagnostics          |
| ICT Dual      | 78.8           | ML03             | 50130        | 09/12                      | 09/14                  | ICT Diagnostics           |
| ICT Pf        | 86.9           | ML01             | 10006        | 05/12                      | 05/14                  | ICT Diagnostics           |
|               |                |                  | 50131        | 05/12                      | 05/14                  | ICT Diagnostics           |

**Figure 1.** ICT Pf Lot #50131 (top photo) ICT Pf Lot #10006 (bottom photo). The control line for Lot #10006 is missing. The tests in the Figure were analyzed at 100 parasites/ $\mu$ L.

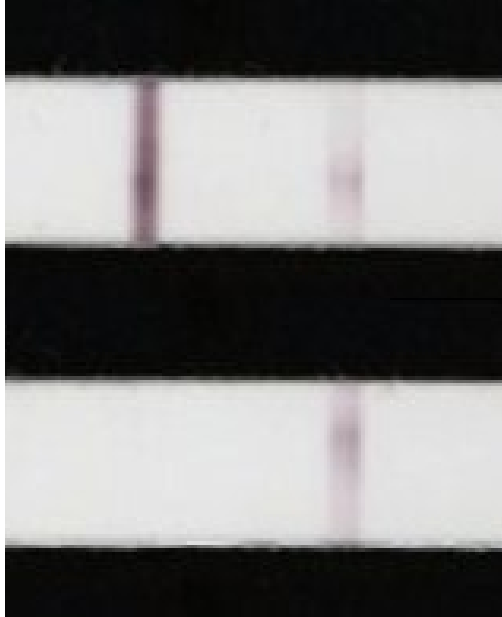

**Figure 2.** The integrated area of the RDT signal for extracted (black bars) and unextracted (gray bars) samples at 200 parasites/ $\mu$ L. These areas were used for the calculation of the enhancement factor.

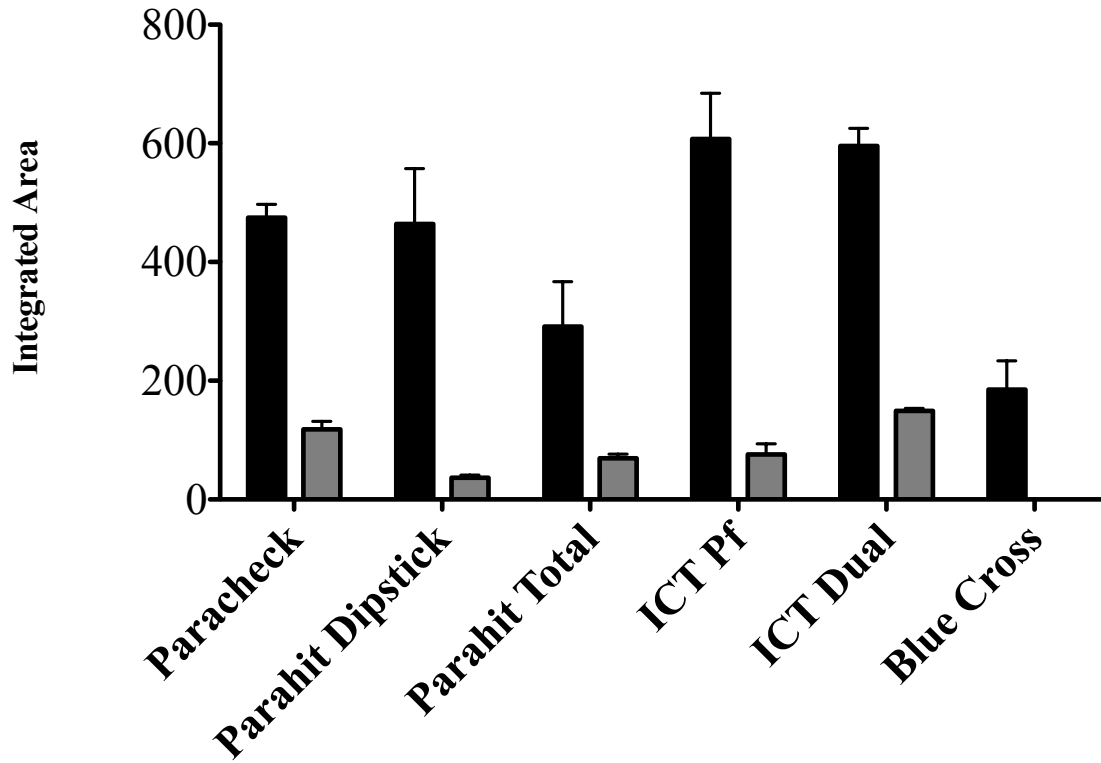

**Figure 3.** Comparison of the calculated limits of detection for extracted (black bars) and unextracted (gray bars) samples based upon the presented pixel analysis algorithm.

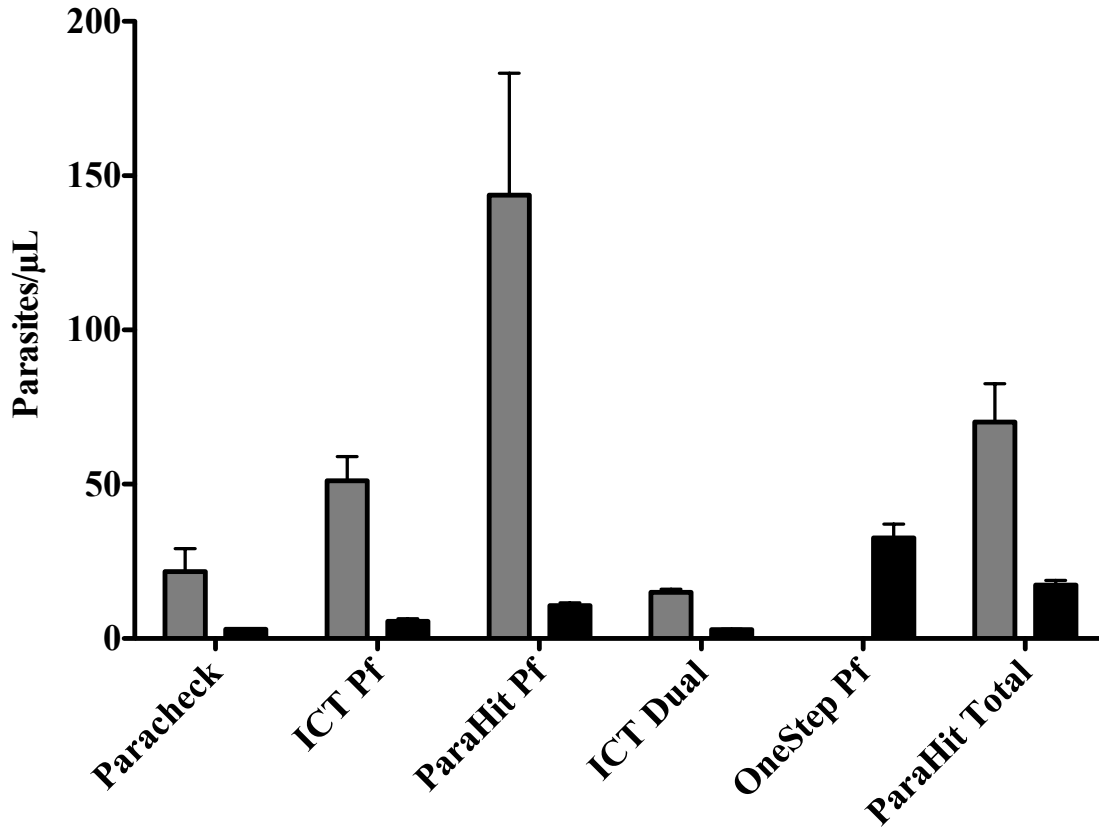

**Figure 4.** Calculated enhancement in the limit of detection for each RDT brand.

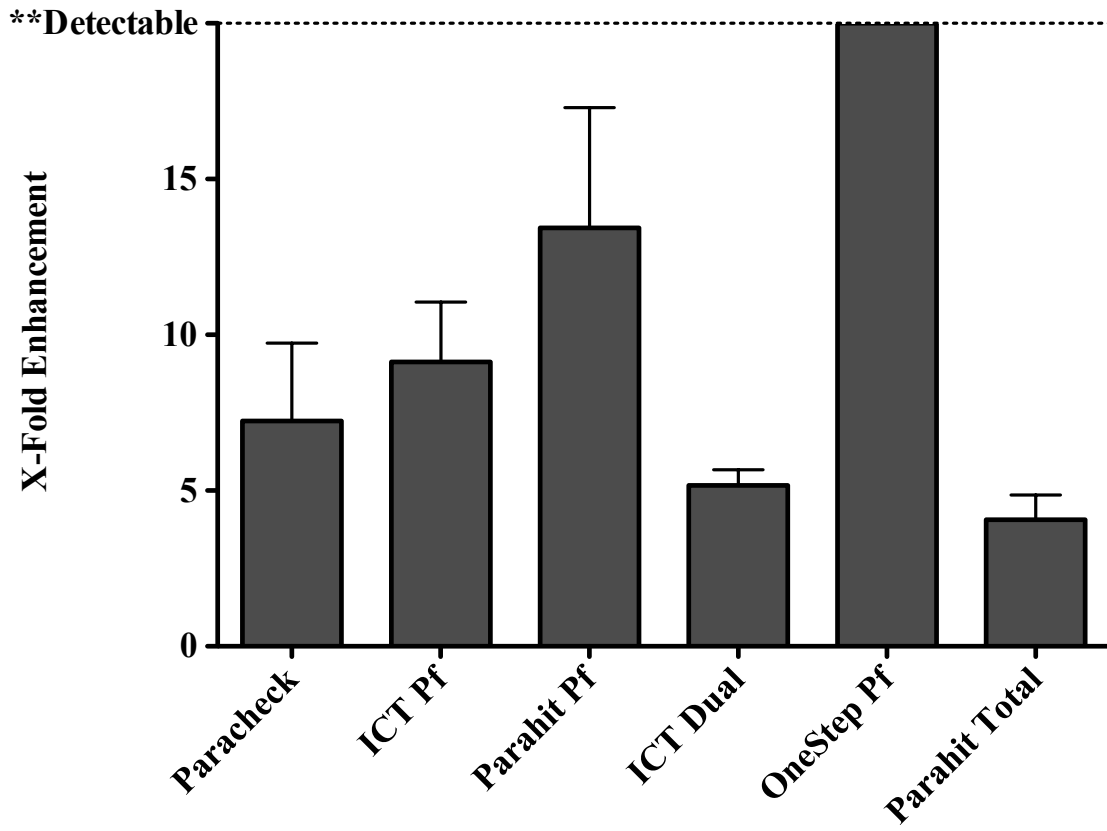

**Figure 5.** The integrated area of the RDT signal for unextracted samples at 2000 parasites/ $\mu$ L. All brands are able to detect *PfHRPII* at this level of parasitemia.

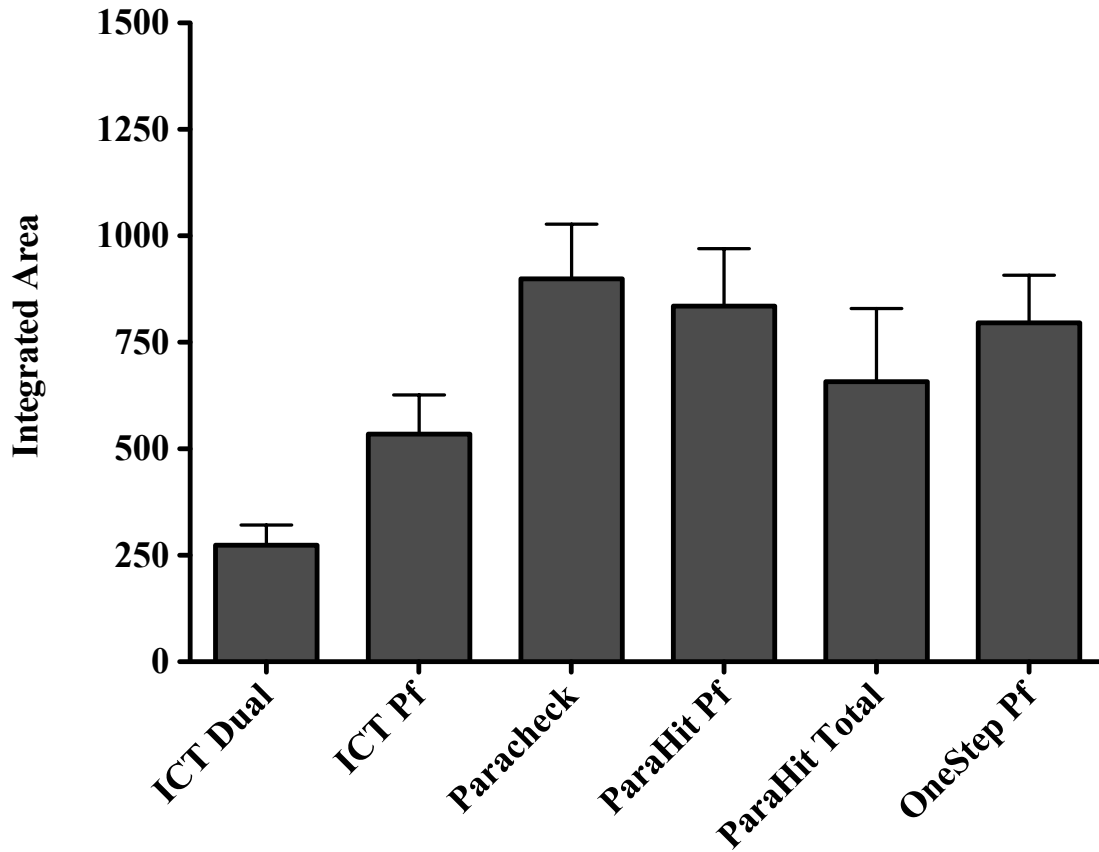



**Figure 6.** One Step RDTs with 200 parasite/ $\mu$ L samples unextracted (top photo) and extracted (bottom photo). Smearing of residual blood (when unextracted) and gold nanoparticles (when extracted) caused difficulty in test analysis.

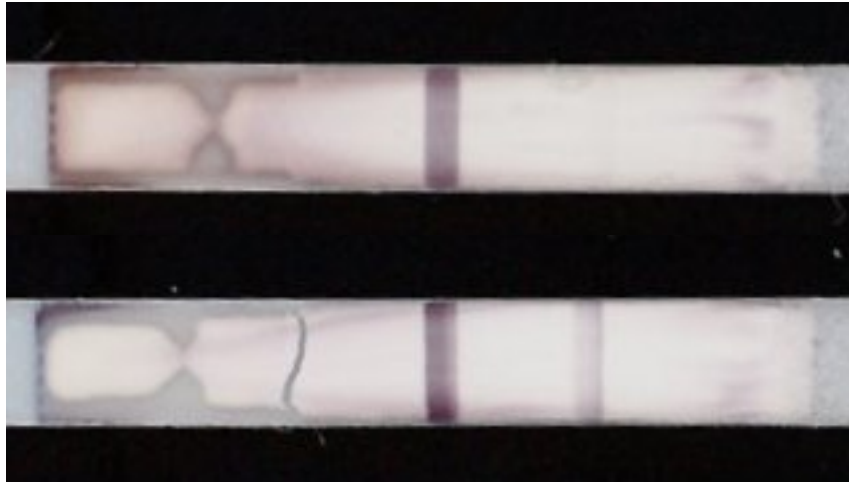

Supplement: c4an00338a1.pdf [file c4an00338a1.pdf]
